# Supplementary material
Source: HighWire-hosted journal article supplement (https://www.ajnr.org/highwire/filestream/75723/field_highwire_adjunct_files/0/19-01291.pdf)
Supplement: 19-01291.pdf [file 19-01291.pdf]

**Online Table 1: Various test metrics for regression. Performance reflects mean of 5 separate seeded runs**

| Regression                         | Accuracy       | RMSE            | Sensitivity    | Specificity    | PPV            | NPV            | AUC ROC         |
|------------------------------------|----------------|-----------------|----------------|----------------|----------------|----------------|-----------------|
| 1 section, random initialization   | 85.66% (2.15%) | 0.1078 (0.0142) | 90.20% (1.95%) | 81.05% (2.81%) | 82.69% (3.10%) | 89.23% (1.60%) | 0.9468 (0.0119) |
| 1 section, pretrained              | 93.84% (0.95%) | 0.0594 (0.0047) | 93.88% (1.80%) | 93.76% (0.75%) | 93.81% (0.72%) | 93.86% (1.69%) | 0.9868 (0.0066) |
| 3 sections, random initialization  | 86.94% (1.60%) | 0.0972 (0.0109) | 90.91% (1.44%) | 82.87% (2.38%) | 84.23% (2.23%) | 90.10% (1.15%) | 0.9542 (0.0070) |
| 3 sections, pretrained             | 95.12% (1.11%) | 0.0539 (0.0036) | 95.12% (1.74%) | 95.08% (1.19%) | 95.14% (1.19%) | 95.11% (1.67%) | 0.9891 (0.0054) |
| 9 sections, random initialization  | 87.67% (2.88%) | 0.0883 (0.0038) | 92.10% (2.15%) | 83.32% (4.31%) | 84.66% (4.28%) | 91.29% (2.19%) | 0.9581 (0.0163) |
| 9 sections, pretrained             | 95.12% (1.32%) | 0.0465 (0.0047) | 94.63% (1.12%) | 95.58% (2.18%) | 95.57% (2.08%) | 94.69% (0.84%) | 0.9907 (0.0042) |
| 27 sections, random initialization | 87.17% (1.10%) | 0.0918 (0.0047) | 92.19% (1.96%) | 82.08% (1.93%) | 83.83% (1.77%) | 91.29% (1.91%) | 0.9572 (0.0095) |
| 27 sections, pretrained            | 94.88% (1.45%) | 0.0487 (0.0067) | 94.18% (1.27%) | 95.59% (1.98%) | 95.52% (2.06%) | 94.24% (1.13%) | 0.9911 (0.0037) |

The numbers in parentheses represent SD.

**Online Table 2: Various test metrics for binary classification on ResNet-152. Performance reflects mean of 5 separate seeded runs**

| Binary Classification             | Accuracy       | Sensitivity    | Specificity    | PPV            | NPV            | AUC ROC         |
|-----------------------------------|----------------|----------------|----------------|----------------|----------------|-----------------|
| 1 section, random initialization  | 90.78% (1.04%) | 88.47% (1.59%) | 93.05% (1.23%) | 92.79% (1.24%) | 88.90% (1.60%) | 0.9646 (0.0092) |
| 1 section, pretrained             | 92.71% (0.72%) | 90.54% (2.03%) | 94.77% (1.94%) | 94.78% (1.41%) | 90.92% (1.59%) | 0.9785 (0.0054) |
| 3 sections, random initialization | 92.29% (0.64%) | 90.79% (1.22%) | 93.74% (1.92%) | 93.68% (1.60%) | 91.00% (1.09%) | 0.9718 (0.0053) |
| 3 sections pretrained             | 93.49% (1.46%) | 91.24% (2.52%) | 95.81% (0.87%) | 95.60% (1.03%) | 91.52% (2.76%) | 0.9856 (0.0042) |

The numbers in parentheses represent SD.

**Online Table 3: Various test metrics for regression on ResNet-152. Performance reflects mean of 5 separate seeded runs**

| Regression                      | Accuracy       | Test RMSE       | Sensitivity    | Specificity    | PPV            | NPV            | AUC ROC         |
|---------------------------------|----------------|-----------------|----------------|----------------|----------------|----------------|-----------------|
| 1 slice, random initialization  | 84.96% (1.93%) | 0.1556 (0.0703) | 88.92% (1.36%) | 81.04% (3.79%) | 82.47% (3.80%) | 87.93% (0.90%) | 0.9333 (0.0106) |
| 1 slice, pretrained             | 94.46% (1.16%) | 0.0603 (0.0054) | 94.01% (2.80%) | 94.84% (1.10%) | 94.88% (0.87%) | 94.14% (2.43%) | 0.9875 (0.0066) |
| 3 slices, random initialization | 87.95% (1.83%) | 0.1205 (0.0564) | 89.28% (1.79%) | 86.59% (2.56%) | 86.94% (2.87%) | 88.98% (1.31%) | 0.9540 (0.0132) |
| 3 slices, pretrained            | 95.16% (0.88%) | 0.0536 (0.0045) | 95.04% (1.89%) | 95.24% (0.33%) | 95.27% (0.24%) | 95.06% (1.83%) | 0.9897 (0.0056) |

**Note:**—RMSE indicates root mean-squared error. The numbers in parentheses represent SD.

**Online Table 4: Details of linear mixed-effects models related to number of input slices<sup>a</sup>**

| Slices          | Accuracy         |         | Sensitivity      |         | Specificity      |         |
|-----------------|------------------|---------|------------------|---------|------------------|---------|
|                 | Odds Ratio       | P Value | Odds Ratio       | P Value | Odds Ratio       | P Value |
| 3               | 1.10 (0.99–1.21) | .077    | 1.12 (0.96–1.30) | .158    | 1.10 (0.94–1.28) | .222    |
| 9               | 1.13 (1.02–1.25) | .022    | 1.20 (1.02–1.40) | .024    | 1.09 (0.94–1.28) | .254    |
| 27              | 1.14 (1.03–1.27) | .013    | 1.19 (1.02–1.39) | .027    | 1.12 (0.96–1.31) | .144    |
| Comparisons     |                  |         |                  |         |                  |         |
| 3 vs. 9 slices  |                  | .608    |                  | .398    |                  | .936    |
| 3 vs. 27 slices |                  | .482    |                  | .421    |                  | .810    |
| 9 vs. 27 slices |                  | .849    |                  | .968    |                  | .748    |

<sup>a</sup> All odds ratios are compared with 1 section input.
